# Supplementary material for: Modeling Ebola Virus Transmission Using Ferrets
Source: PubMed Central journal article supplement (PMC6211219; doi:10.1128/msphere.00309-18), 2018-10-31
Supplement: sph006182689st3.pdf [file sph006182689st3.pdf]

Prepared for the week of:

Animal ID #:

| Parameter         | Degree of parameter                                                                  | DPI            | 1     | 2     | 3     | 4     | 5     | 6     | 7     |
|-------------------|--------------------------------------------------------------------------------------|----------------|-------|-------|-------|-------|-------|-------|-------|
|                   |                                                                                      | Possible Score | Score | Score | Score | Score | Score | Score | Score |
| Posture           | Normal                                                                               | 0              |       |       |       |       |       |       |       |
|                   | Decreasing activity, Decreasing normal behaviour, pilo-erection                      | 3              |       |       |       |       |       |       |       |
|                   | Huddled , not moving in cage                                                         | 5              |       |       |       |       |       |       |       |
| Temperature Chnge | Increase in body temperature above 2°C (n=38.9)                                      | 5              |       |       |       |       |       |       |       |
| Weight Change     | Decrease in body weight of more than 10%                                             | 10             |       |       |       |       |       |       |       |
| Respiration       | Normal                                                                               | 0              |       |       |       |       |       |       |       |
|                   | Increased or Decreased                                                               | 2              |       |       |       |       |       |       |       |
|                   | Laboured, breathing through mouth                                                    | 10             |       |       |       |       |       |       |       |
|                   | Cough or sneeze                                                                      | 2              |       |       |       |       |       |       |       |
| Feces + Urine     | Normal consistency volume / Soft normal stool                                        | 0              |       |       |       |       |       |       |       |
|                   | Feces absent or dry / Decreased urine output / Cloudy urine                          | 2              |       |       |       |       |       |       |       |
|                   | Wet pasty / Small very dry stool / dark stool                                        | 2              |       |       |       |       |       |       |       |
|                   | Liquid stool / blood in stool or urine<br>No urine > twice                           | 10             |       |       |       |       |       |       |       |
| Food + water      | Normal eating / drinking                                                             | 0              |       |       |       |       |       |       |       |
|                   | Mildly decreased E/D 25%                                                             | 1              |       |       |       |       |       |       |       |
|                   | Moderately decreased E/D 50 %                                                        | 3              |       |       |       |       |       |       |       |
|                   | Severely decreased E/D 75%                                                           | 4              |       |       |       |       |       |       |       |
|                   | Seriously decreased - refusing all food, dehydration apparent > 2 days               | 10             |       |       |       |       |       |       |       |
| Recumbent         | No symptoms                                                                          | 0              |       |       |       |       |       |       |       |
|                   | Huddled on camera, active when cage opened                                           | 3              |       |       |       |       |       |       |       |
|                   | Lies down but moves around                                                           | 15             |       |       |       |       |       |       |       |
|                   | Lies down and won't move                                                             | 25             |       |       |       |       |       |       |       |
| Attitude          | Normal                                                                               | 0              |       |       |       |       |       |       |       |
|                   | Mildly depressed, responds to treats and toys                                        | 1              |       |       |       |       |       |       |       |
|                   | Moderately depressed, response requires prodding, loses interest in treats and toys, | 3              |       |       |       |       |       |       |       |
|                   | Severely depressed, no interest in treats, does not respond to human presence        | 10             |       |       |       |       |       |       |       |
| Other             | Flushed appearance to skin                                                           | 2              |       |       |       |       |       |       |       |
|                   | Nasal discharge                                                                      | 2              |       |       |       |       |       |       |       |
|                   | Visible Rash                                                                         | 5              |       |       |       |       |       |       |       |
|                   | Cyanosis                                                                             | 5              |       |       |       |       |       |       |       |
|                   | Haemorrhage                                                                          | Subcutaneous   | 10    |       |       |       |       |       |       |
|                   |                                                                                      | Orifices       | 15    |       |       |       |       |       |       |
| Total score*      |                                                                                      | 0-64*          |       |       |       |       |       |       |       |
| BODY Weight       |                                                                                      |                |       |       |       |       |       |       |       |
| SCAN Temp         |                                                                                      |                |       |       |       |       |       |       |       |
| Rectal Temp       |                                                                                      |                |       |       |       |       |       |       |       |

\* The PI or co-investigator will consult with a veterinarian to make a decision regarding euthanasia when a total score of 25 is reached

\* The control animals will only be allowed to reach a score of 20 before a decision is made regarding euthanasia.
